# Supplementary material
Source: publisher site journal article supplement (https://www.dovepress.com/article/479276)
Supplement: Supplementary file 1 [file get_supplementary_file.php]

**
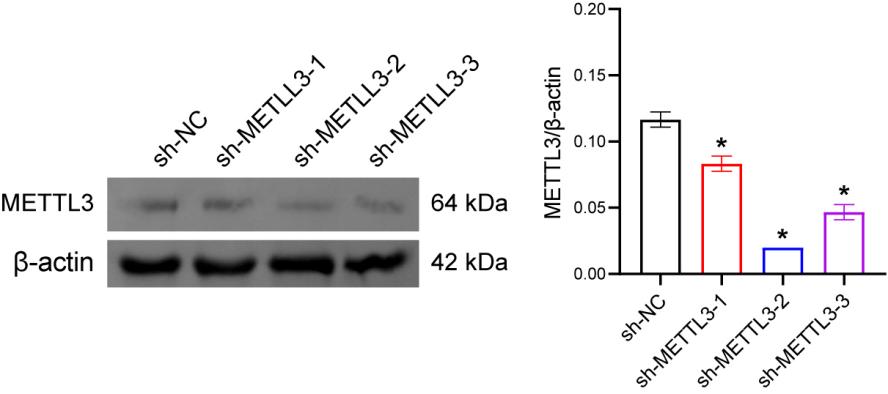
**

**Figure S1: Detection of sh-METTL3 knockdown efficiency.** RT-qPCR and Western blot analysis of METTL3 expression in HUVECs. *P<0.05 *vs.* the sh-NC group.
